# Supplementary material for: Reducing VEGFB accelerates NAFLD and insulin resistance in mice via inhibiting AMPK signaling pathway
Source: PubMed Central journal article supplement (PMC9338666; doi:10.1186/s12967-022-03540-2), 2022-07-30

**Table S1 Kaplan-Meier curve**

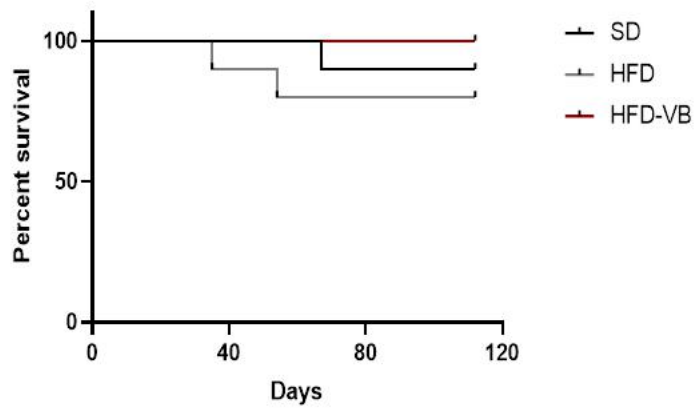

Supplement: 12967_2022_3540_MOESM1_ESM.pdf [file 12967_2022_3540_MOESM1_ESM.pdf]
